# Supplementary material for: Pt(iv) complexes based on cyclohexanediamines and the histone deacetylase inhibitor 2-(2-propynyl)octanoic acid: synthesis, characterization, cell penetration properties and antitumor activity
Source: Royal Society of Chemistry journal article supplement (doi:10.1039/d0dt04135a), 2021-01-01
Supplement: d0dt04135a1.pdf [file d0dt04135a1.pdf]

**Pt(IV) complexes based on cyclohexanediamines and the histone deacetylase inhibitor 2-(2-propynyl)octanoic acid: synthesis, characterization, cell penetration properties and antitumor activity**

Elisabetta Gabano,<sup>1</sup> Beatrice Rangone,<sup>1</sup> Elena Perin,<sup>1</sup> Giulia Caron,<sup>2</sup> Giuseppe Ermondi,<sup>2</sup> Maura Vallaro,<sup>2</sup> Valentina Gandin,<sup>3</sup> Cristina Marzano,<sup>3</sup> Alessandra Barbanente,<sup>4</sup> Nicola Margiotta,<sup>4</sup> Mauro Ravera,<sup>1,\*</sup>

<sup>1</sup> Dipartimento di Scienze e Innovazione Tecnologica, Università del Piemonte Orientale, Viale Michel 11, 15121 Alessandria (Italy)

<sup>2</sup> Dipartimento di Biotecnologie Molecolari e Scienze per la Salute, Università di Torino, Via Quarello 15, 10135 Torino (Italy)

<sup>3</sup> Dipartimento di Scienze del Farmaco, Università di Padova, Via Marzolo 5, 35131 Padova (Italy)

<sup>4</sup> Dipartimento di Chimica, Università di Bari, Via Orabona 4, 70125 Bari (Italy)

**ELECTRONIC SUPPLEMENTARY INFORMATION**

Content:

|                              |                                                                                                                             |
|------------------------------|-----------------------------------------------------------------------------------------------------------------------------|
| <b>Figure S1-Figure S5</b>   | HPLC, ESI-MS and NMR characterization of complex <b>2</b>                                                                   |
| <b>Figure S6-Figure S10</b>  | HPLC, ESI-MS and NMR characterization of complex <b>2R</b>                                                                  |
| <b>Figure S11-Figure S15</b> | HPLC, ESI-MS and NMR characterization of complex <b>2S</b>                                                                  |
| <b>Figure S16</b>            | Polar Surface Area (PSA) of [PtCl <sub>2</sub> (1,2-dach)], kiteplatin, <b>1R</b> , <b>1S</b> , <b>2R</b> , and <b>2S</b> . |

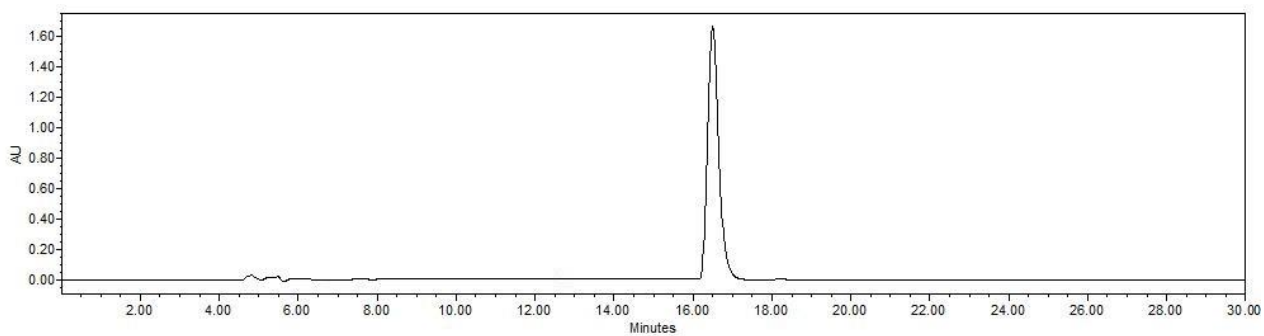

**Figure S1.** HPLC-UV chromatogram of complex **2**.

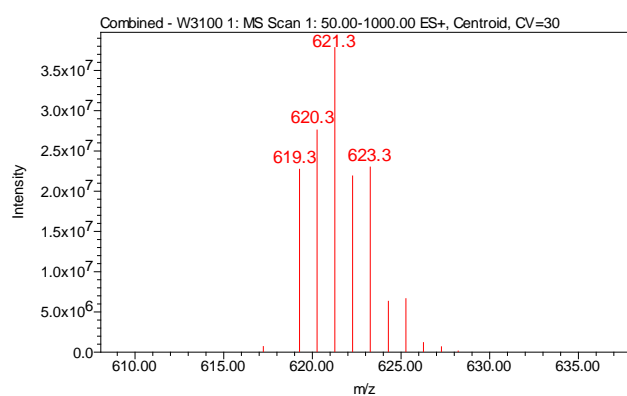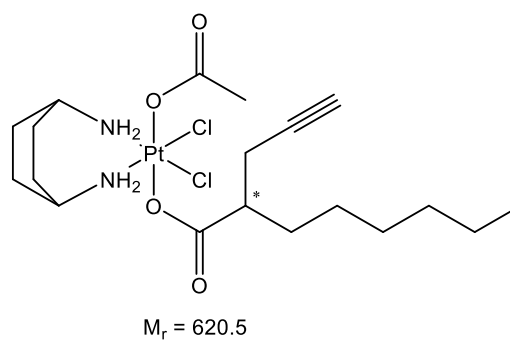

**Figure S2.** ESI-MS spectrum and molecular structure of complex **2**.

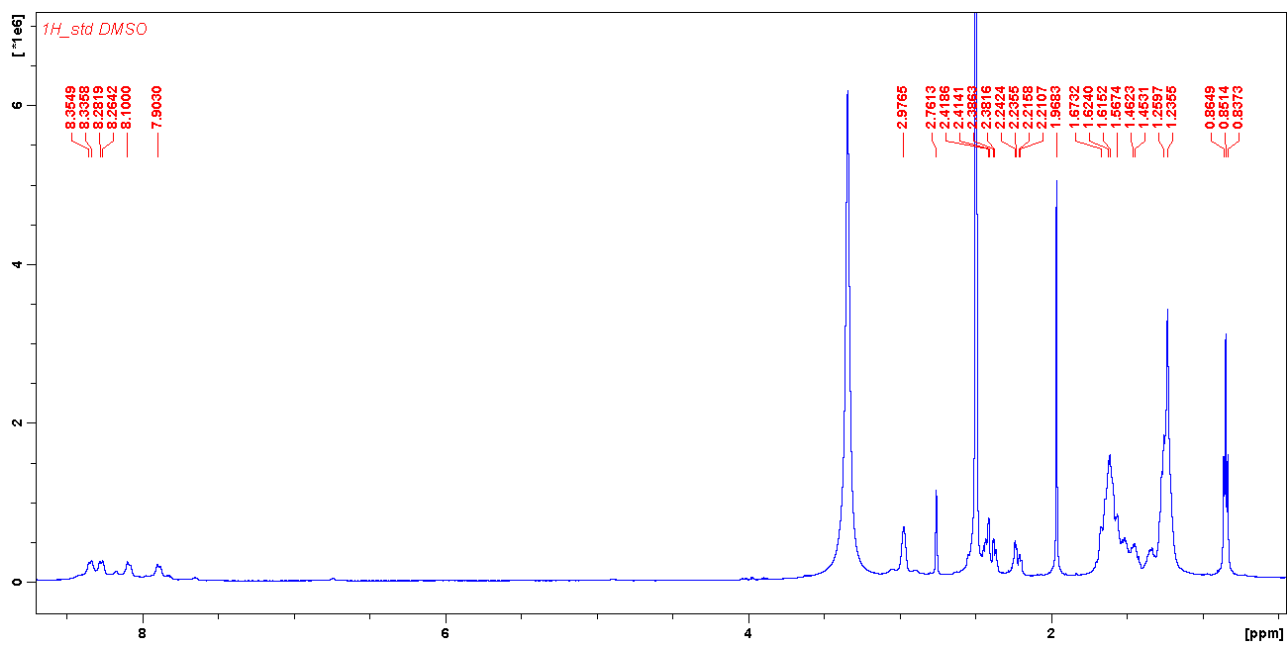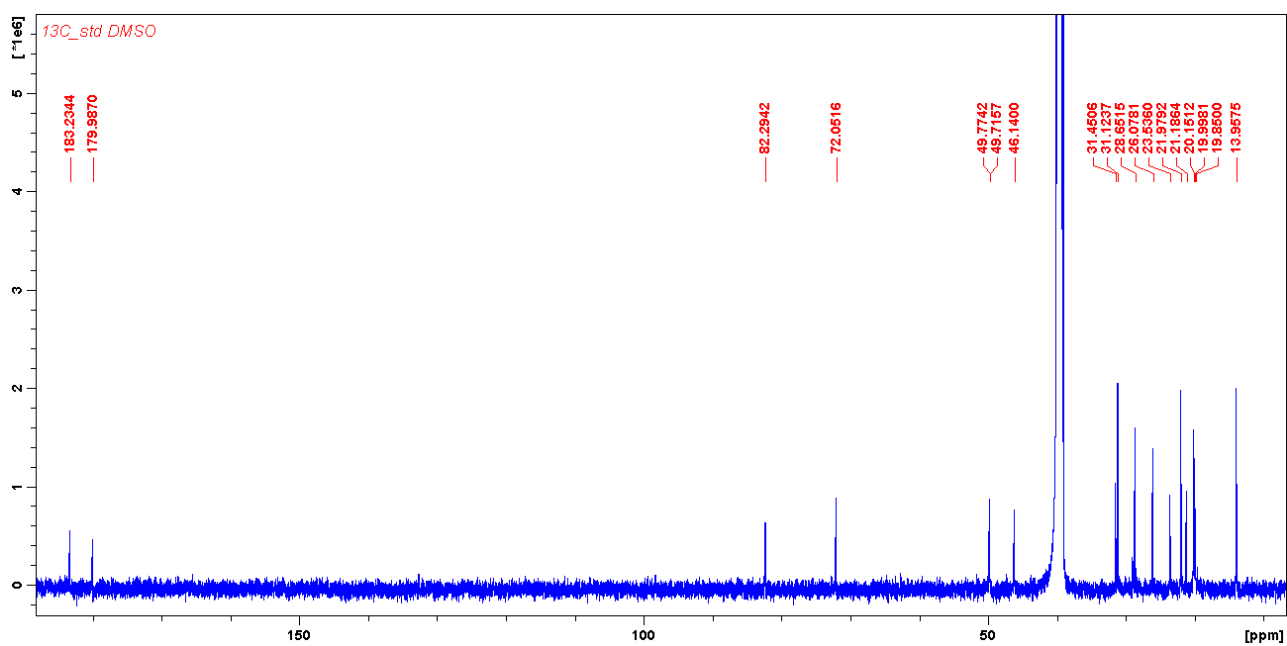

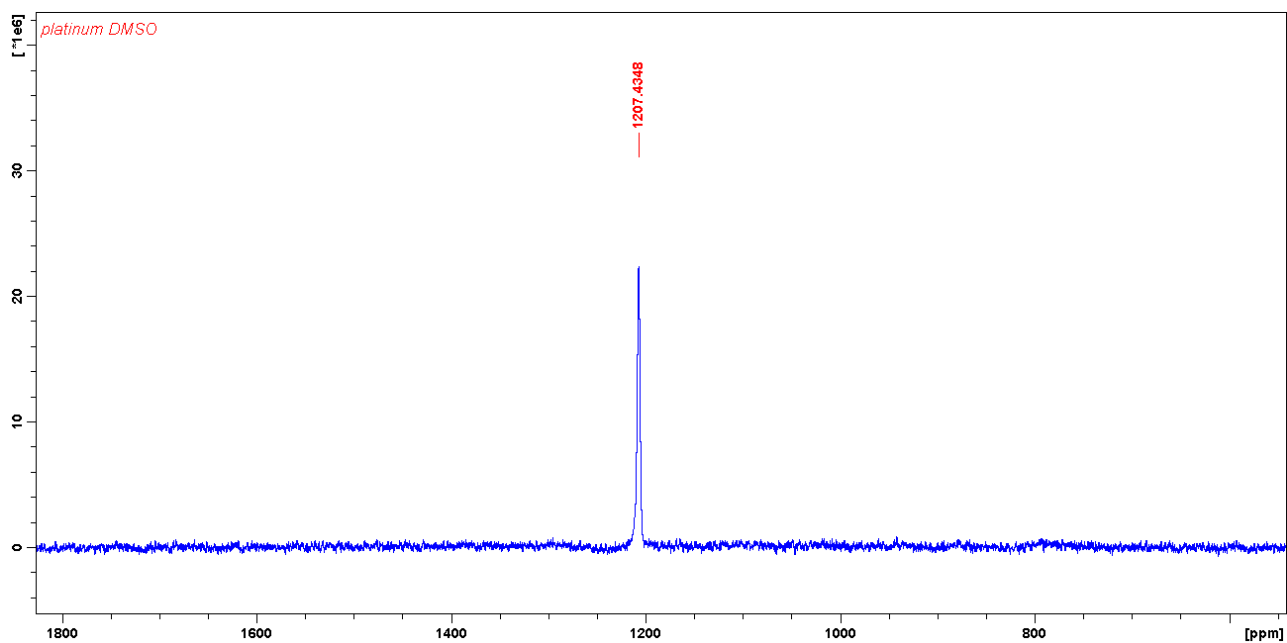

Figure S5.  $^{195}\text{Pt}$ -NMR spectrum of **2**

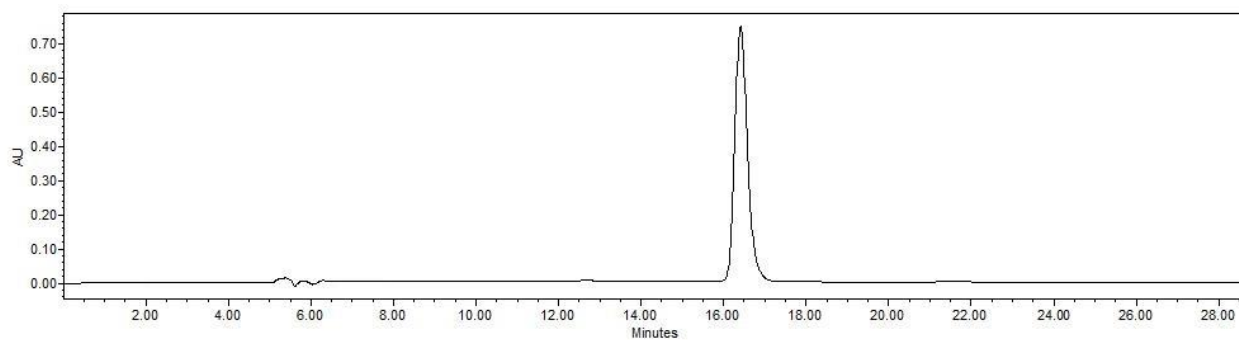

Figure S6. HPLC-UV chromatogram of complex **2R**

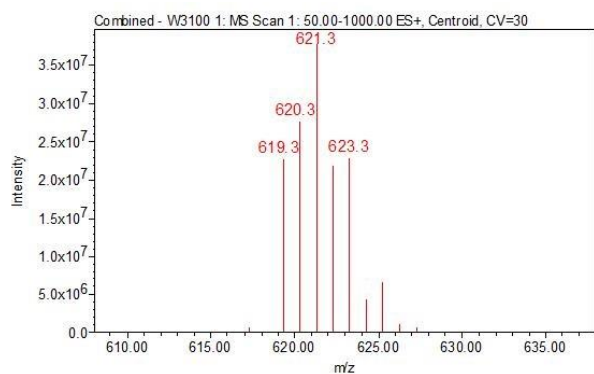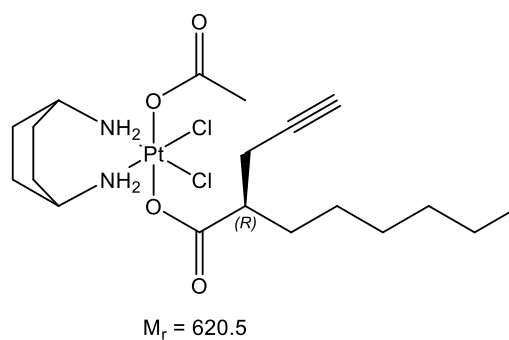

Figure S7. ESI-MS spectrum and molecular structure of complex **2R**.

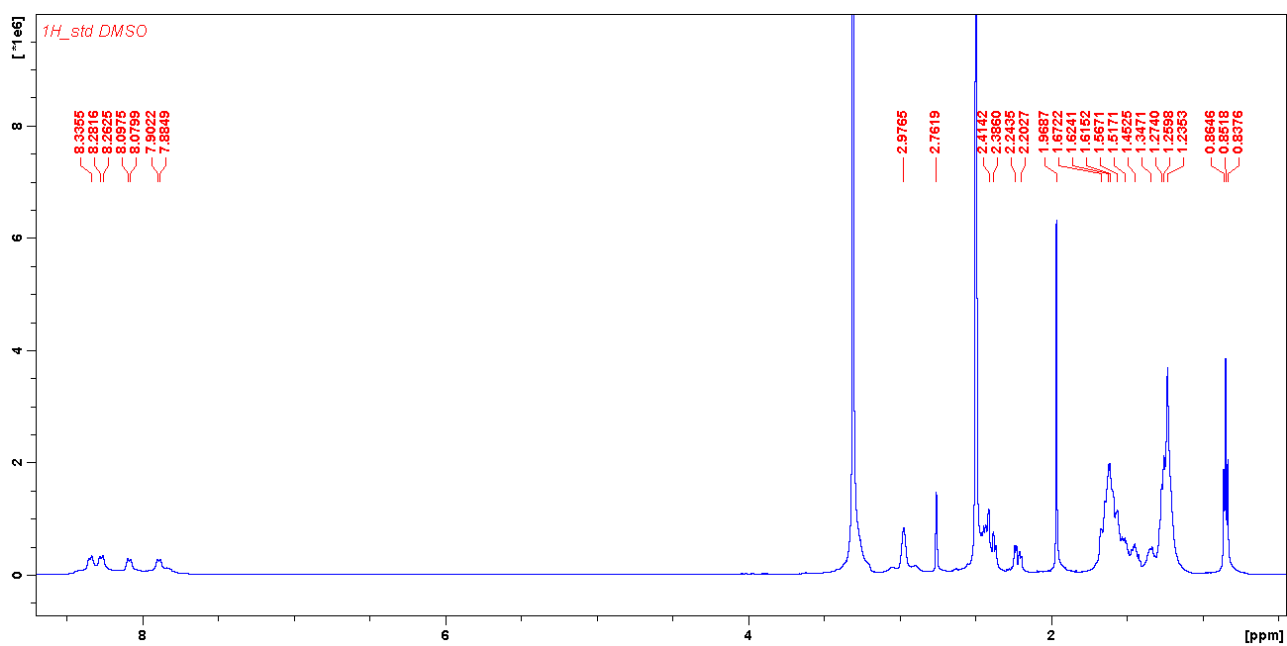

Figure S8.  $^1\text{H}$ -NMR spectrum of **2R**

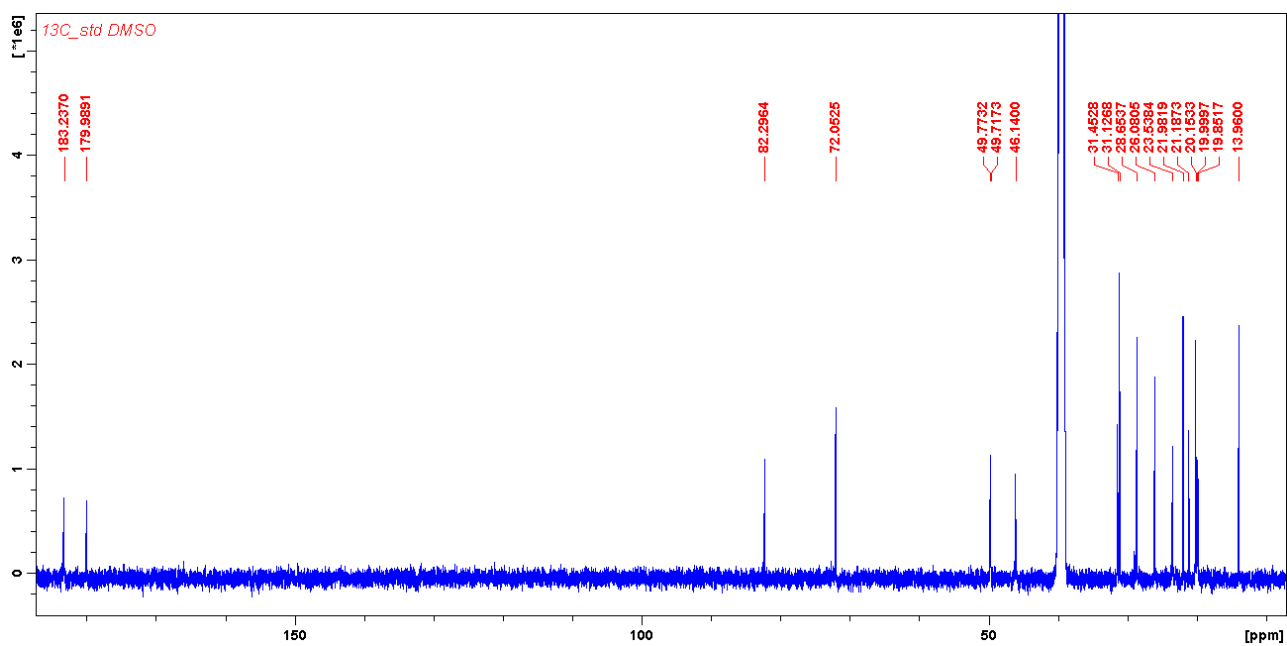

Figure S9.  $^{13}\text{C}$ -NMR spectrum of **2R**

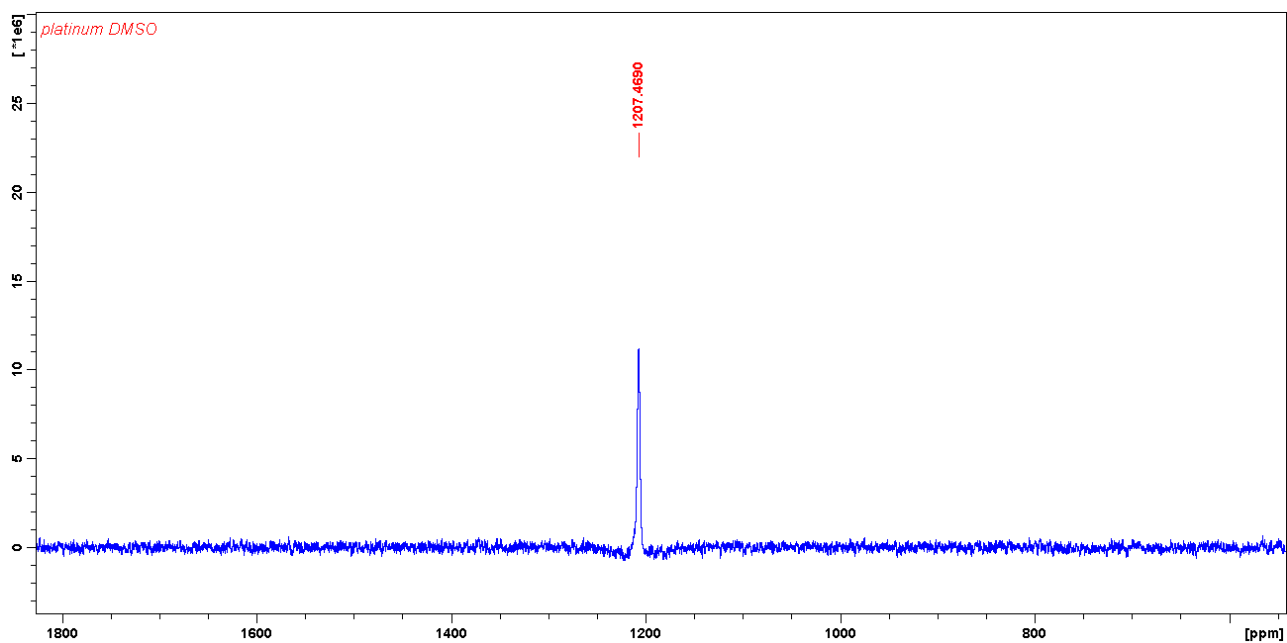

**Figure S10.**  $^{195}\text{Pt}$ -NMR spectrum of **2R**

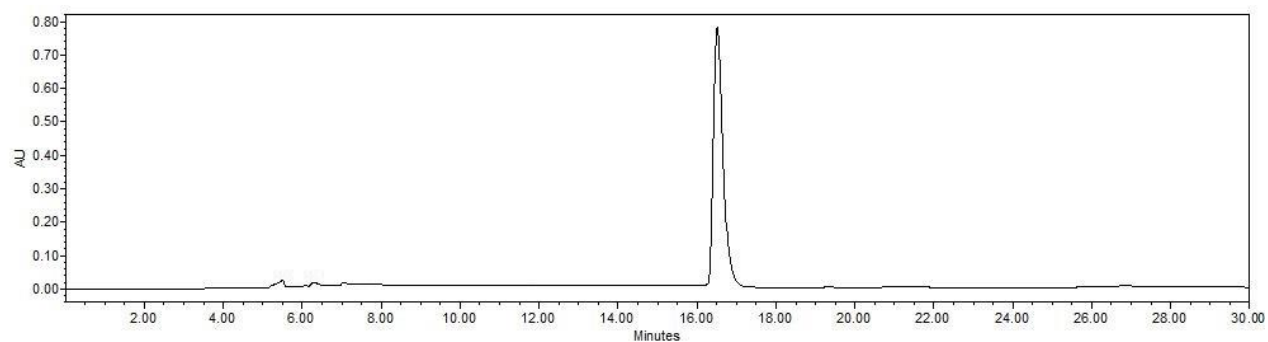

**Figure S11.** HPLC-UV chromatogram of complex **2S**

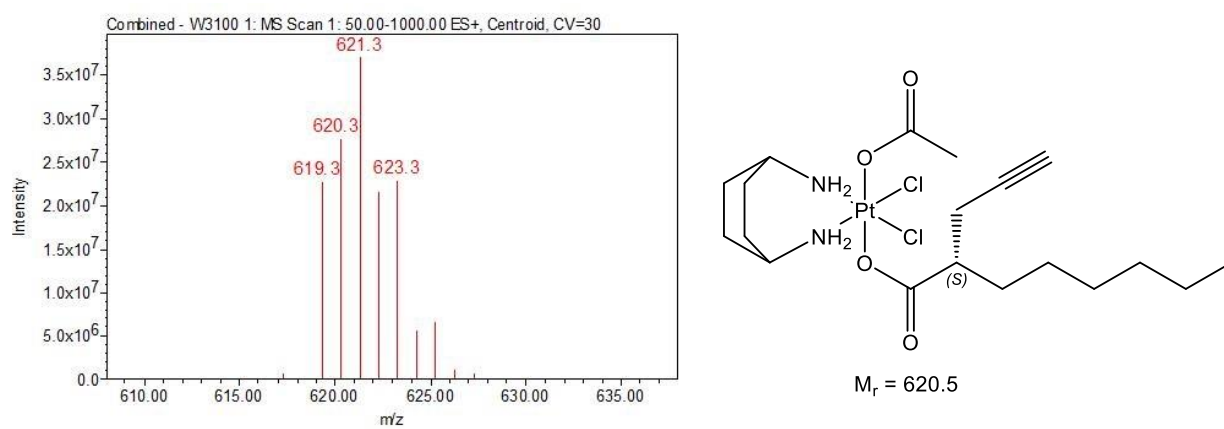

**Figure S12.** ESI-MS spectrum and molecular structure of complex **2S**.

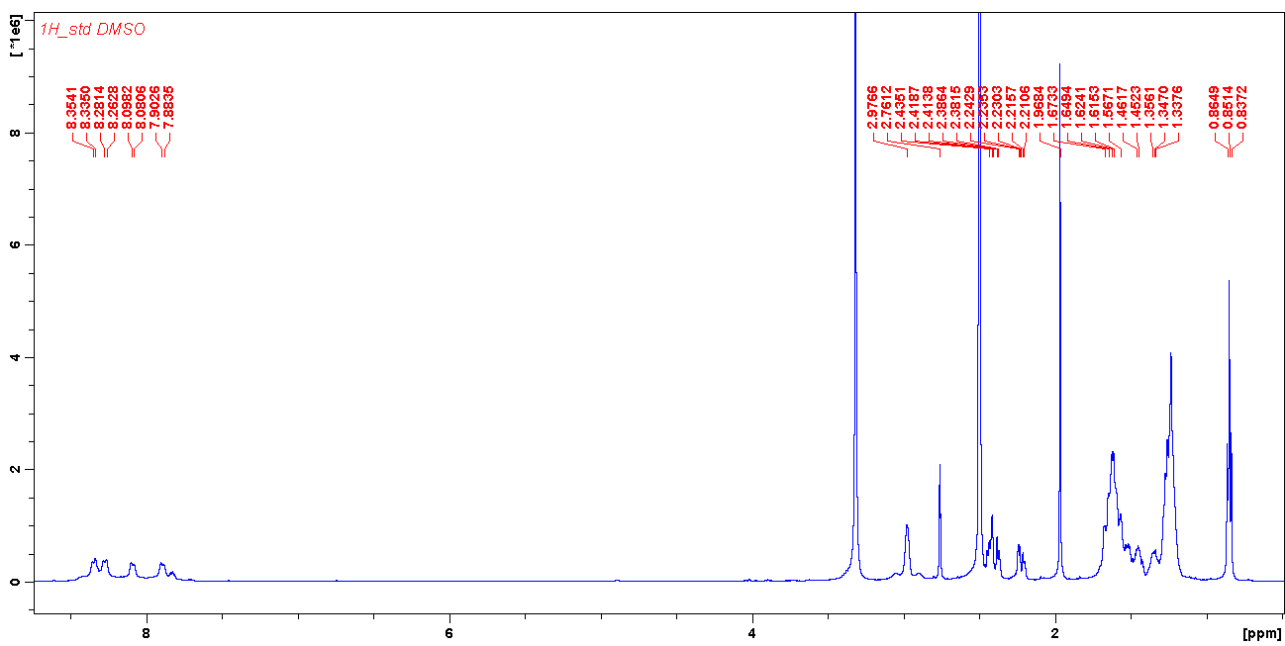

**Figure S13.**  $^1\text{H}$ -NMR spectrum of **2S**

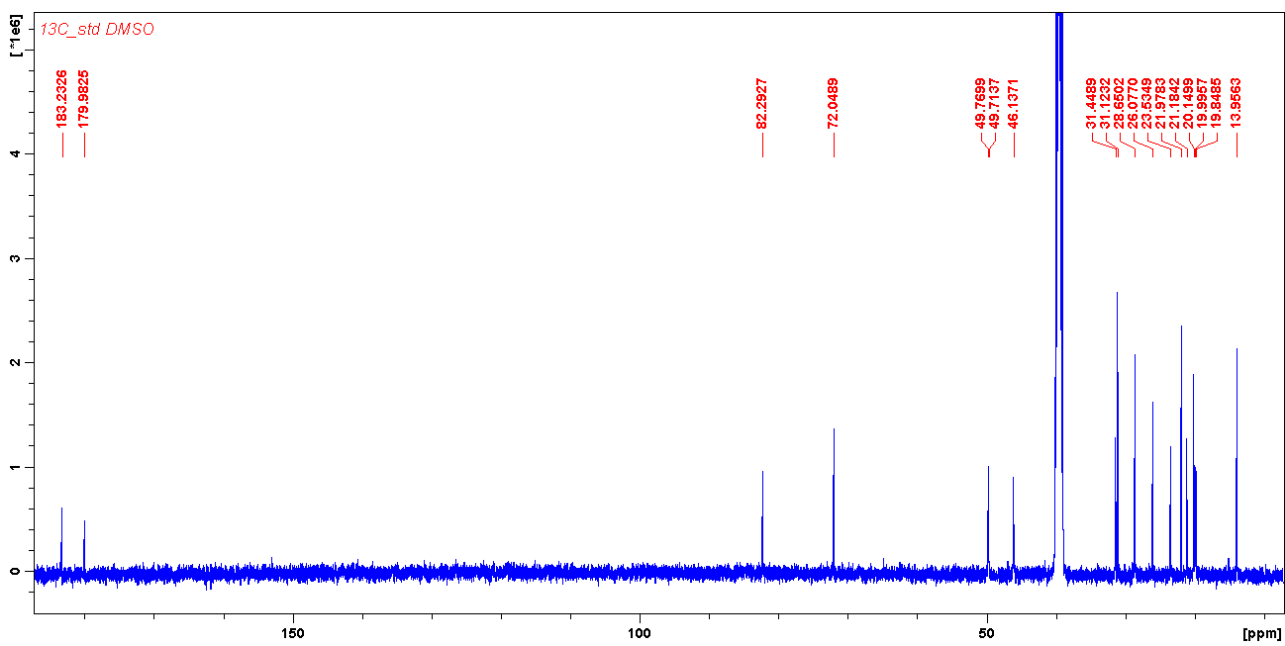

**Figure S14.**  $^{13}\text{C}$ -NMR spectrum of **2S**

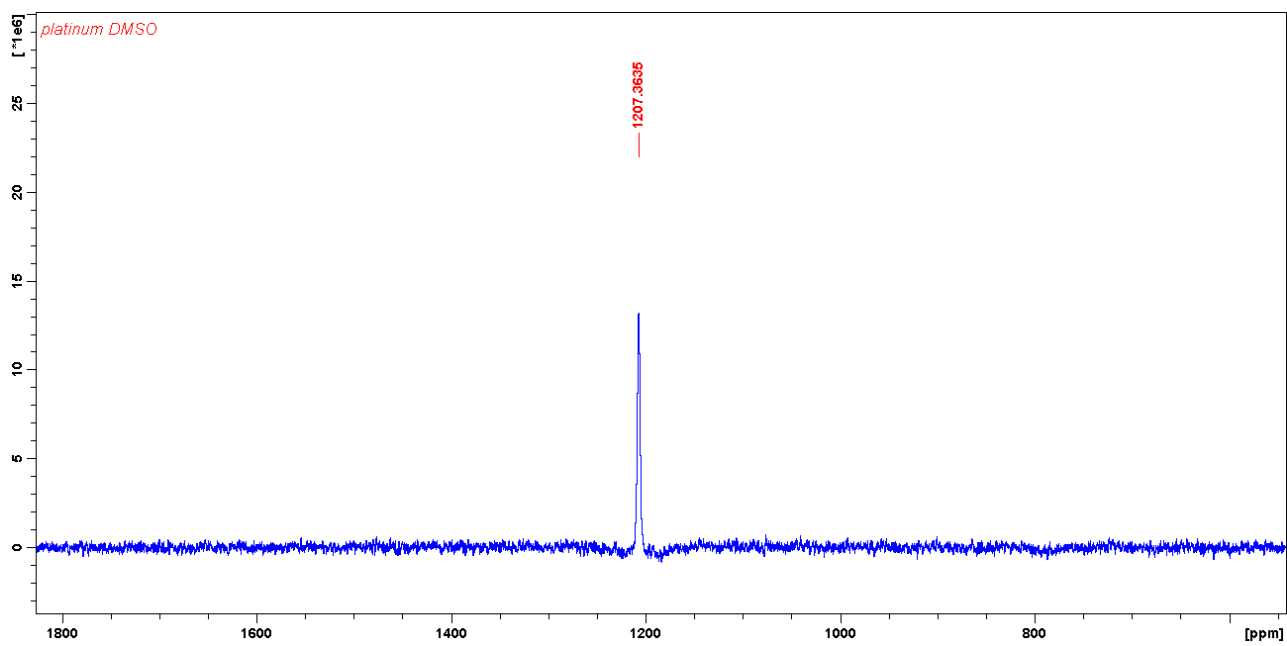

**Figure S15.**  $^{195}\text{Pt}$ -NMR spectrum of **2S**



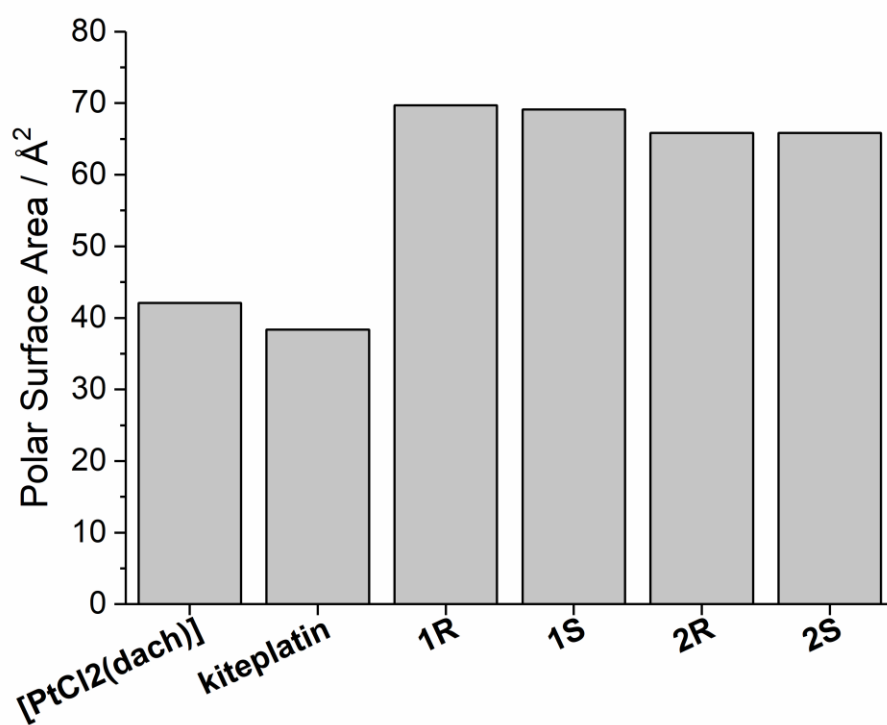

**Figure S16.** Polar Surface Area (PSA) of [PtCl<sub>2</sub>(1,2-dach)], kiteplatin, **1R**, **1S**, **2R**, and **2S** calculated using the minimum energy conformer minimized with PM6.
